# Simulated maternal stress reduces offspring aerobic swimming performance in Pacific salmon

Amanda I. Banet<sup>1,2,\*</sup>, Stephen J. Healy<sup>2</sup>, Erika J. Eliason<sup>2,3</sup>, Edward A. Roualdes<sup>4</sup>, David A. Patterson<sup>5</sup> and Scott G. Hinch<sup>2</sup>

<sup>1</sup>Department of Biological Sciences, California State University, Chico, 400 W. First Street, Chico, CA 95929, USA

<sup>2</sup>Pacific Salmon Ecology and Conservation Laboratory, Department of Forest and Conservation Sciences, University of British Columbia, 2424 Main Mall, Vancouver, BC, V6T 1Z4, Canada

<sup>3</sup>Department of Ecology, Evolution, and Marine Biology, University of California, Santa Barbara, Santa Barbara, CA 93106, USA

<sup>4</sup>Department of Mathematics and Statistics, California State University, Chico, 400 W. First Street, Chico, CA 95929, USA

<sup>5</sup>Fisheries and Oceans Canada, Science Branch, Pacific Region, Co-operative Resource Management Institute, School of Resource Environmental Management, Simon Fraser University, 8888 University Drive, Burnaby, BC, V5A 1S6, Canada

\*Corresponding author: Department of Biological Sciences, California State University, Chico, CA 95929, USA. Email: mandybanet@gmail.com

Pacific salmon routinely encounter stressors during their upriver spawning migration, which have the potential to influence offspring through hormonally-mediated maternal effects. To disentangle genetic vs. hormonal effects on offspring swimming performance, we collected gametes from three species of Pacific salmon (Chinook, pink and sockeye) at the end of migration and exposed a subset of eggs from each female to cortisol baths to simulate high levels of maternal stress. Fertilised eggs were reared to fry and put through a series of aerobic swim trials. Results show that exposure to cortisol early in development reduces maximum oxygen consumption while swimming, and decreases aerobic scope in all three species. Resting oxygen consumption did not differ between cortisol and control treatment groups. We also examined several metrics that could influence aerobic performance, and found no differences between treatment groups in haematocrit%, haemoglobin concentration, heart mass, citrate synthase activity or lactate dehydrogenase activity. Though it was not the focus of this study, an interesting discovery was that pink salmon had a higher  $MO_{2max}$  and aerobic scope relative to the other species, which was supported by a greater haematocrit, haemoglobin, a larger heart and higher CS activity. Some management and conservation practices for Pacific salmon focus efforts primarily on facilitating adult spawning. However, if deleterious effects of maternal stress acquired prior to spawning persist into the next generation, consideration will need to be given to sub-lethal effects that could be imparted onto offspring from maternal stress.

**Key words:** cortisol, maternal effects, *Oncorhynchus*, Pacific salmon, respirometry, swimming performance

**Editor:** Steven Cooke

Received 20 February 2019; Revised 4 October 2019; Editorial Decision 3 November 2019; Accepted 21 November 2019

**Cite as:** Banet AI, Healy SJ, Eliason EJ, Roualdes EA, Patterson DA, Hinch SG (2019) Simulated maternal stress reduces offspring aerobic swimming performance in Pacific salmon. *Conserv Physiol* 7(1): coz095; doi:10.1093/conphys/coz095.

## Introduction

An organism's phenotype is influenced not only by genetics and environmental factors, but also by maternal effects, whereby the mother's genotype, phenotype and body condition indirectly affect offspring in utero (Wolf and Wade, 2009). Historically, maternal effects were thought to have only a minor role in ecology, but in recent years their importance has become increasingly clear (Bernardo, 1996; Ho and Burggren, 2010). In many cases, maternal effects are considered adaptive (Mousseau and Fox, 1998). For example, female guppies (*Poecilia reticulata*) on a restricted diet produce larger offspring (Reznick *et al.*, 1996), which are better adapted to survive in conditions with low food availability (Hutchings, 1991). In another study, *Daphnia cucullata* offspring whose mothers had been exposed to a predator had longer helmets (an inducible defence against predators) than offspring whose mothers were not exposed to predators (Agrawal *et al.*, 1999).

The aforementioned studies show that maternal effects, or more generally, parental effects, can provide a mechanism for an organism to be prepared for variable environmental conditions. However, if a population has not experienced similar variation in environmental conditions over evolutionary time, it is unlikely that an adaptive response will have had time to evolve. In such cases, maternal effects may instead be a non-adaptive physiological consequence of environmental conditions (Marshall and Uller, 2007). This is of particular relevance because anthropogenic habitat degradation and climate change are increasingly exposing animals to rapidly changing environmental conditions that fall outside of their historic range. Thus, understanding maternal effects on offspring characteristics is a critical step to understanding how a given population may respond to these changes—an important consideration for conservation and management decisions (Charmantier and Garant, 2005; Burt *et al.*, 2010).

Pacific salmon encounter numerous stressors during their upriver spawning migration, including warm water temperatures and high encountered flows. The direct effects of these stressors have been widely documented and in many instances are becoming more severe as climates continue to warm (Martins *et al.*, 2012a). Adult pink salmon (*Oncorhynchus gorbuscha*) and sockeye salmon (*Oncorhynchus nerka*) that experienced high temperatures during a laboratory-simulated migration had an increase in physiological biomarkers of stress compared to their low-temperature counterparts, including changes in protein folding, protein synthesis, metabolism, oxidative stress and ion transport (Jeffries *et al.*, 2014). Simulated fisheries capture and handling produced a major stress response in these same species, increasing activation of genes involved in cellular stress, and plasma levels of stress indicators such as cortisol and lactate (Donaldson *et al.*, 2014). Cook *et al.* (2014) found that after being captured, adult sockeye salmon with higher levels of physiological stress exhibited reduced migration

success. A number of other studies have found additional detrimental patterns of adult salmon stress (Bradford *et al.*, 2010; Veldhoen *et al.*, 2010; Martins *et al.*, 2012b; Eliason *et al.*, 2013; Gale *et al.*, 2014; Raby *et al.*, 2015).

Environmental stressors also have the potential to indirectly affect the next generation via hormonally-mediated maternal effects. Maternal cortisol, a glucocorticoid hormone involved in the stress response, can be transferred from mother to egg (Stratholt *et al.*, 1997) and may affect offspring characteristics later in life. For example, Tierney *et al.* (2009) examined the influence of maternal condition on offspring locomotor performance in sockeye salmon. They examined swimming performance differences between offspring reared from eggs that were collected from females that were classified as spawn-ready (good condition) or moribund (poor condition) at the end of their spawning migration. Moribund females had higher plasma cortisol and blood lactate levels than spawn-ready females, indicating higher levels of stress. The study found that offspring from moribund females had poorer performance on a number of swimming metrics, including reduced endurance (a measure of aerobic performance), poorer schooling performance and a shorter distance travelled when startled. These differences may be due to exposure to maternal cortisol early in development, but the design of the study allows for alternative explanations. For example, it is possible that the females had genetic differences in swimming ability that made some of them less equipped to deal with the demands of migration, and these genetic differences in swimming ability were passed on to their offspring.

The aim of this study is to disentangle the effect of cortisol exposure early in development on offspring aerobic swimming performance from other aspects of maternal identity. We first compare aerobic swimming performance between siblings that either have or have not been exposed to simulated maternal stress via a cortisol bath at fertilisation. If exposure to maternal cortisol contributed to the results found by Tierney *et al.* (2009), then fishes that were exposed to the cortisol baths should exhibit a reduction in aerobic swimming performance as compared to control fish. We then examine the mechanistic underpinnings of the differences in swimming performance by comparing physiological traits that determine an organism's ability to use oxygen to produce energy.

## Materials and methods

### Study system

This study examines three species of anadromous, semelparous Pacific salmon from the Fraser River Drainage: sockeye salmon (*O. nerka*) from Weaver Creek, Chinook salmon (*Oncorhynchus tshawytscha*) from the Chilliwack River Hatchery and pink salmon (*O. gorbuscha*) from the Seton River (Fig. 1). These species have ecological, economic and cultural value in the North Pacific, making them the

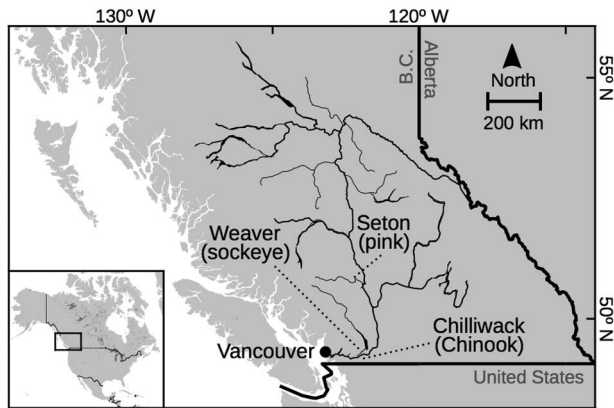

**Figure 1:** Map of the Fraser River Drainage, British Columbia, Canada. Spawning locations of the three populations of Pacific salmon used in this study are labeled. Respirometry trials were conducted at the University of British Columbia campus in Vancouver, B.C., Canada.

focus of conservation and sustainable management efforts throughout their range (Quinn, 2005).

### Gamete collection and rearing

This study followed animal use protocols approved by the Canadian Council on Animal Care and the University of British Columbia Animal Care Committee. Adult fishes were sacrificed by manually applied percussive stunning followed by pithing. Gametes were then manually stripped from the fish into sterile plastic containers by palpating the abdomen. Unfertilised gametes from each individual were housed in separate, labelled container(s) and placed in an insulated cooler for transport. Eggs were housed no more than two layers thick in the containers and milt was housed in containers that allowed a large surface area, in order to ensure oxygen exchange. The transport cooler contained several commercial ice packs, which were separated from the gamete containers with a layer of polystyrene foam. After collection, gametes were transported to the University of British Columbia aquatic facility for fertilisation. Gametes were collected in autumn 2013 for all species. Collection occurred on 9 October for Seton River pink salmon, 21 October for Chilliwack River hatchery Chinook salmon and 23 October for Weaver Creek sockeye salmon.

Fertilisations occurred within 24 hours of gamete collection and followed methods similar to Sopinka *et al.* (2015). Fourteen grams of eggs from a single female were weighed and measured into a glass jar and fertilised with 0.15 ml of milt from a single male. This was done in duplicate to create matched control and cortisol-treated full sibling crosses. Initially, 30 ml of water was added to each jar to activate the sperm. After 2 minutes, an additional 370 ml of water was added to each jar. Cortisol treatment fertilisations were conducted using dechlorinated facility water that

had been dosed to contain 1000 ng/ml of cortisol (H4001; Sigma). Ninety-five percent ethanol was needed to dissolve the cortisol, which resulted in a 0.002% final concentration in the treated water. Control treatment fertilisations were conducted using dechlorinated facility water that contained 0.002% ethanol, in order to control for any effects of ethanol exposure. The concentration of cortisol in the treated water was chosen to match previous studies that used cortisol baths to increase egg cortisol within an ecologically relevant range (Auperin and Geslin, 2008; Sopinka *et al.*, 2015). This process resulted in nine unique crosses for Chinook salmon, nine for pink salmon and 12 for sockeye salmon.

After 2 hours, fertilised eggs from each jar were rinsed and transferred to a flow through basket and incubated at  $9.5 \pm 1^\circ\text{C}$  in temperature-controlled heath stacks until emergence. For sockeye and pink salmon, a subset of eggs were rinsed and collected two hours after fertilisation in order to confirm that treatment egg cortisol levels increased to a level within an ecologically relevant range. Cortisol assays did indeed confirm this (see online supporting information for detail). Dead eggs were recorded and removed from heath stacks daily. Fertilisation-to-hatch duration was approximately 57 days (541 accumulated thermal units, or ATU) for pink salmon, 54 days (513 ATU) for Chinook salmon and 65 days (617.5 ATU) for sockeye salmon. After button-up, emergent fish were transferred to 1000-l flow-through troughs, which had mesh dividers to separate families and treatment groups. Fish were fed fishmeal *ad libitum* until  $\sim 48$  hours prior to aerobic trials. Light cycle throughout the experiment mimicked a natural photoperiod ( $49.2606^\circ\text{N}$ ,  $123.2460^\circ\text{W}$ ). Water temperature of the flow-through troughs that housed the fish varied depending on the environmental temperature, and ranged from 4.5 to  $11.0^\circ\text{C}$  over the course of the experiment.

### Aerobic swimming trials

Aerobic trials were conducted from 7 April 2014 to 25 June 2014 (fish mass: Chinook salmon, mean and 95% CI =  $0.7161 \pm 0.081$  g, range = 0.4072–1.0376 g; pink salmon, mean and 95% CI =  $0.4291 \pm 0.082$  g, range = 0.2517–0.6286 g; sockeye salmon, mean and 95% CI =  $0.7421 \pm 0.065$  g, range = 0.5191–1.0148 g). Aerobic performance was measured using two Loligo Systems 170 ml mini-swim respirometers (Loligo Systems, Viborg, Denmark) following methods similar to Svendsen *et al.* (2013) with minor modifications. Two respirometers allowed two trials to be run per day, including one control fish and one cortisol treatment fish from a full-sibling pair. The respirometers were identical models, but as an extra precaution, we alternated treatment groups between the respirometers to prevent any differences in the equipment from confounding our data. For each trial, a fish was introduced to the working section of the swimming respirometer and allowed to acclimate overnight for a minimum of 15 hours in water moving

at 0.5 cm/second. This speed allowed water to mix inside the tunnel, but the fish was able to rest on the bottom of the respirometer without actively swimming. Fully aerated water was flushed through the respirometer during the acclimation period. Water temperature was maintained at  $7 \pm 0.1^\circ\text{C}$  using aquarium chillers and heaters regulated by a thermostat. In order to reduce disturbances, we covered the respirometer with a layer of black plastic with a small opening that allowed observation. After the acclimation period, the respirometer chamber was sealed and we measured resting oxygen consumption ( $\text{MO}_{2\text{rest}}$ ).  $\text{MO}_{2\text{rest}}$  has been defined various ways in the literature (Munday *et al.*, 2012; Schaeffer *et al.*, 2012; Eliason *et al.*, 2013); for the purposes of this study, we define  $\text{MO}_{2\text{rest}}$  as the mean oxygen consumption of a fish resting on the bottom of the tunnel over a 30-minute period after at least 15 hours of acclimation. After  $\text{MO}_{2\text{rest}}$  was measured, we exposed the fish to incremental increases of water velocity of  $2 \text{ cm}\cdot\text{second}^{-1}$  every 2 minutes. When the fish appeared to be approaching its maximum swimming capacity (e.g. it exhibited early stages of bursting and gliding), the respirometer chamber was sealed for measurement, and we reduced the frequency of water velocity increases to every 5 minutes. The trial continued until the fish fatigued and fell against the back of the tunnel for a minimum of 10 seconds. Maximum oxygen consumption ( $\text{MO}_{2\text{max}}$ ) was estimated using the mass-specific rate of oxygen consumption obtained for the final 5-minute period of the trial prior to fatigue, with the exception of four fish that fatigued before 5 minutes of data could be collected. This included one control chinook (3m37s), one cortisol-treated chinook (3m20s), one control sockeye (3m14s) and one cortisol-treated sockeye (3m0s). For these fish,  $\text{MO}_{2\text{max}}$  was estimated using the truncated data available before fatigue. For all trials, including those from fish that fatigued before 5 minutes of  $\text{MO}_{2\text{max}}$  data could be collected, the  $R^2$  value of oxygen consumption over time was greater than 0.98. This strong linear relationship suggests that the data collected during the four truncated trials were commensurate to those in which we were able to collect a full 5 minutes of data. The slope of oxygen consumption over time was used in conjunction with fish mass and swim tunnel volume to calculate mass-specific oxygen consumption. Total sample sizes are available in Table 1. Aerobic scope was calculated as the difference between the  $\text{MO}_{2\text{max}}$  and  $\text{MO}_{2\text{rest}}$ . Trials were excluded from the study if the fish defecated in the tunnel during acclimation, or if the fish was actively moving during the resting measurement. Background oxygen loss was checked routinely throughout the study using empty respirometers for 30 minutes and determined to be negligible.

### Blood and heart mass

Haematocrit and haemoglobin data were collected from a second subset of experimental fish, which were not used in the aerobic trials. Fish were euthanized in a lethal dose of MS-222 ( $250 \text{ mg L}^{-1}$  buffered to pH 7.0; Sigma Aldrich, Darmstadt, Germany), dried with a Kimwipe, and weighed

to the nearest ten-thousandth of a gram. The tail was then severed posterior to the anal fin in order to access blood from the caudal vein. Blood for haemoglobin analysis was collected on cuvette, measured using a HemoCue™ Hb 201+ Analyzer (Hemocue AB, Ängelholm, Sweden), and calibrated following methods in Clark *et al.* (2008). Blood for haematocrit analysis was collected in a heparinized microhaematocrit tube, spun in a microhaematocrit centrifuge at 8000 rpm for 5 minutes, and packed-cell volume was measured using a microhaematocrit reader card.

Heart mass was collected from a third subset of experimental fish. Fish were euthanized in MS-222, dried with a Kimwipe and weighed to the nearest ten-thousandth of a gram. The heart was then carefully removed via dissection under a stereomicroscope at  $10\times$  magnification, dabbed gently on a Kimwipe to remove excess fluids, and weighed to the nearest ten-thousandth of a gram.

### Enzyme assays

Enzyme assays were conducted on tail muscle samples from a fourth subset of experimental fish. Fish were euthanized in MS-222, frozen in liquid nitrogen, and transferred to a  $-80^\circ\text{C}$  freezer for later analysis. These samples were collected during the same time frame as the aerobic trials. Activity of citrate synthase (CS), an enzyme involved in the citric acid cycle and lactate dehydrogenase (LDH), an enzyme that catalyses the interconversion of pyruvate and lactate, were measured following methods similar to Dalziel and Schulte (2012), including pilot assays to determine appropriate substrate concentrations for analysis. Briefly, muscle tissue posterior to the dorsal fin was dissected from the fish, and the tail and skin were removed from the sample. The muscle was weighed and added to 10 volumes of buffer ( $50 \text{ mmol L}^{-1}$  Hepes,  $1 \text{ mmol L}^{-1}$  EDTA and 0.1% Triton X-100; pH 7.4) with 0.5 mm zirconium oxide beads equal to  $3\times$  the mass of the muscle tissue. This sample was homogenized at 1700 rpm (Geno/Grinder 2010, SPEX SamplePrep, Stanmore, UK) for 2.5 minutes, put on ice for 2.5 minutes, and re-homogenized for another 2.5 minutes. An additional 1:1 volume of homogenization buffer was then added to the sample, and it was refrozen at  $-80^\circ\text{C}$ . Enzyme activity was determined at  $25^\circ\text{C}$  using a temperature-controlled plate spectrophotometer. For CS assays, we took  $25 \mu\text{L}$  of frozen homogenate, thawed it on ice, and added  $25 \mu\text{L}$  of Tris buffer before pipetting  $10 \mu\text{L}$  of the diluted sample into plate wells. The CS assay was run with final concentrations of  $0.15 \text{ mmol L}^{-1}$  DTNB,  $0.15 \text{ mmol L}^{-1}$  Acetyl CoA, and  $0.5 \text{ mmol L}^{-1}$  oxaloacetate in  $50 \text{ mmol L}^{-1}$  Tris. For LDH assays, we took  $4 \mu\text{L}$  of frozen homogenate, thawed it on ice and added  $46 \mu\text{L}$  of Tris buffer before pipetting  $10 \mu\text{L}$  of the diluted sample into plate wells. The LDH assay was run with final concentrations of  $5 \text{ mmol L}^{-1}$  NADH and  $25 \text{ mmol L}^{-1}$  pyruvate in  $50 \text{ mmol L}^{-1}$  Tris. All assays were measured in triplicate, and background reaction rates of buffer with no substrate present were subtracted from measured values.



**Table 1:** Results from linear mixed model analyses. Dependent variables are listed in the left column and fixed effects are listed across the top of the table. Bold text indicates statistical significance. A dash indicates a variable that was not included in the model. Sample sizes are listed in the following format: chinook control, chinook cortisol: pink control, pink cortisol: sockeye control, sockeye cortisol

|                           | Treatment                            | Species                                 | Fish mass                               | Block (Respirometer)                | Species × treatment                     |
|---------------------------|--------------------------------------|-----------------------------------------|-----------------------------------------|-------------------------------------|-----------------------------------------|
| <b>MO<sub>2rest</sub></b> | $F_{1,26} = 0.03$                    | <b><math>F_{2,27} = 9.67</math></b>     | -                                       | $F_{1,26} = 0.02$                   | $F_{2,26} = 0.11$                       |
| $n = 9,9:9,9:12,12$       | $P = 0.86$                           | $P = \mathbf{0.0007}$                   | -                                       | $P = 0.88$                          | $P = 0.90$                              |
| <b>MO<sub>2max</sub></b>  | <b><math>F_{1,26} = 30.67</math></b> | <b><math>F_{2,27} = 47.59</math></b>    | -                                       | <b><math>F_{1,26} = 8.03</math></b> | $F_{2,26} = 2.69$                       |
| $n = 9,9:9,9:12,12$       | $P < \mathbf{0.0001}$                | $P < \mathbf{0.0001}$                   | -                                       | $P = \mathbf{0.009}$                | $P = 0.09$                              |
| <b>Aerobic scope</b>      | <b><math>F_{1,26} = 29.58</math></b> | <b><math>F_{2,27} = 32.44</math></b>    | -                                       | <b><math>F_{1,26} = 7.02</math></b> | $F_{2,26} = 2.40$                       |
| $n = 9,9:9,9:12,12$       | $P < \mathbf{0.0001}$                | $P < \mathbf{0.0001}$                   | -                                       | $P = \mathbf{0.01}$                 | $P = 0.11$                              |
| <b>Haematocrit</b>        | $F_{1,64.46} = 0.37$                 | <b><math>F_{2,28.26} = 33.50</math></b> | $F_{1,89.23} = 3.70$                    | -                                   | $F_{2,67.22} = 0.71$                    |
| $n = 17,18:19,17:14,14$   | $P = 0.54$                           | $P < \mathbf{0.0001}$                   | $P = 0.06$                              | -                                   | $P = 0.49$                              |
| <b>Haemoglobin</b>        | $F_{1,65.45} = 2.47$                 | <b><math>F_{2,28.18} = 54.37</math></b> | <b><math>F_{1,83.32} = 9.25</math></b>  | -                                   | $F_{2,68.98} = 0.98$                    |
| $n = 18,18:18,17:14,14$   | $P = 0.12$                           | $P < \mathbf{0.0001}$                   | $P = \mathbf{0.003}$                    | -                                   | $P = 0.38$                              |
| <b>Heart mass</b>         | $F_{1,65.72} = 0.05$                 | <b><math>F_{2,28.27} = 40.88</math></b> | <b><math>F_{1,80.90} = 78.84</math></b> | -                                   | $F_{2,68.70} = 0.46$                    |
| $n = 18,18:18,17:14,14$   | $P = 0.83$                           | $P < \mathbf{0.0001}$                   | $P < \mathbf{0.0001}$                   | -                                   | $P = 0.63$                              |
| <b>CS activity</b>        | $F_{1,103.16} = 0.65$                | <b><math>F_{2,19.06} = 25.37</math></b> | -                                       | -                                   | <b><math>F_{2,103.16} = 3.93</math></b> |
| $n = 16,17:24,24:23,24$   | $P = 0.42$                           | $P < \mathbf{0.0001}$                   | -                                       | -                                   | $P = \mathbf{0.02}$                     |
| <b>LDH activity</b>       | $F_{1,107} = 0.00$                   | <b><math>F_{2,19} = 40.06</math></b>    | -                                       | -                                   | <b><math>F_{2,107} = 4.49</math></b>    |
| $n = 18,18:24,24:24,24$   | $P > 0.99$                           | $P < \mathbf{0.0001}$                   | -                                       | -                                   | $P = \mathbf{0.01}$                     |

### Statistical analyses

All statistical analyses were conducted using R (R Core Team, 2016). We used linear mixed models to test for differences between treatment groups for each of our target variables (MO<sub>2rest</sub>, MO<sub>2max</sub>, aerobic scope, heart mass, haematocrit, haemoglobin, CS and LDH). Sibling pairs were treated as random variables to account for correlations between observations due to relatedness. *P*-values for mixed models were estimated via approximate *F*-tests with Kenward–Roger approximated degrees of freedom (Kenward and Roger, 1997). Species, treatment and the interaction between species and treatment were included as fixed effects in analyses for MO<sub>2rest</sub>, MO<sub>2max</sub> and aerobic scope. Respirometer was also included as a blocking variable in these analyses. We did not include fish mass in the aerobic analyses reported below; however, we did run an additional analysis (not reported) that included fish mass as a factor and found that there were no qualitative differences in terms of significance for any of the other covariates included in the mixed models. Species, fish mass, treatment and the interaction between species and treatment were included as fixed effects in analyses for heart size, haematocrit and haemoglobin. Species, treatment and the interaction between species and treatment were included as fixed effects in analyses for CS and LDH. Alpha was set at 0.05 for all analyses. Sample sizes are available in Table 1. Though it was not the main focus of the study, we examined differences between species by conducting hypothesis tests

of estimated marginal means while controlling for multiple comparisons using Tukey’s method for *P*-value adjustments (Searle *et al.*, 1980; Lenth, 2018).

## Results

### Aerobic performance

MO<sub>2rest</sub> was significantly influenced by species, but it was not significantly affected by cortisol treatment, block (respirometer), or the interaction between species and treatment (Table 1, Fig. 2). Tukey *post hoc* tests of the estimated marginal means show that sockeye salmon had a higher MO<sub>2rest</sub> than chinook salmon in both the control and cortisol fish (Online supplement Tables S1 and S2).

MO<sub>2max</sub> and aerobic scope were both significantly lower in cortisol treated fish, and there were significant effects of species and block (respirometer) (Table 1, Fig. 2). All species showed a similar response to the cortisol treatment (Table 1, Fig. 2 and online supplement Table S1). Tukey *post hoc* tests of the estimated marginal means (Online supplement Tables S1 and S2) show that pink salmon had a higher MO<sub>2max</sub> and aerobic scope than Chinook and sockeye salmon in both control and cortisol-treated groups. In cortisol-treated fish, sockeye salmon had a higher MO<sub>2max</sub> than Chinook salmon.

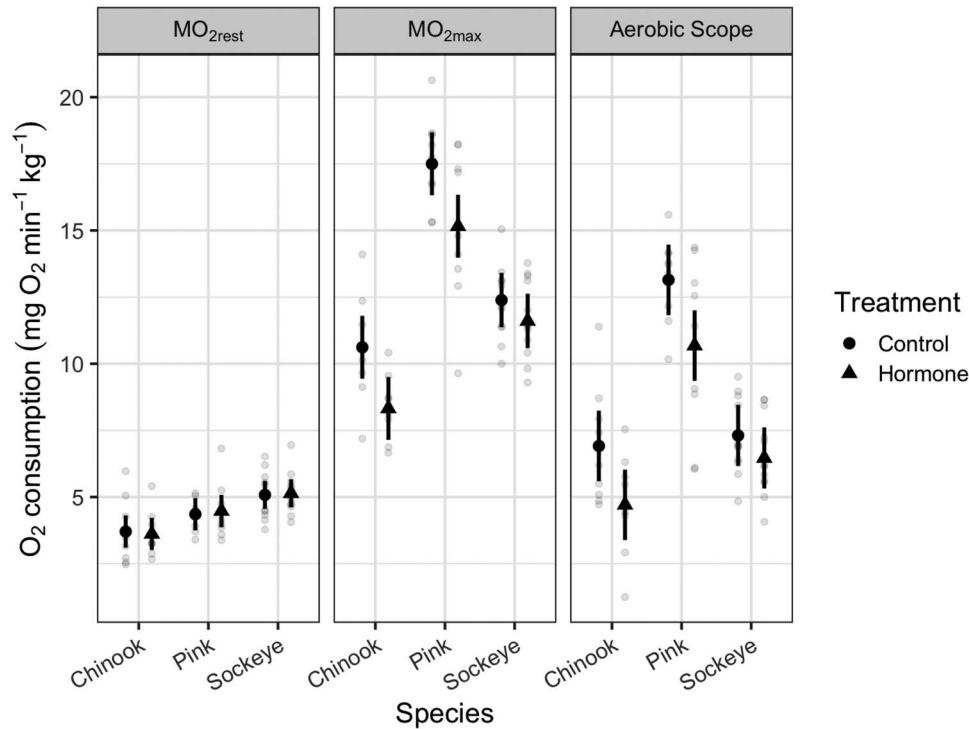

**Figure 2:** Aerobic performance of three species of Pacific salmon. Estimated marginal means averaged over block (respirometer) and 95% confidence intervals are shown in black. Grey circles represent individual fish. Cortisol exposure had no effect on resting oxygen consumption ( $MO_{2rest}$ ), but significantly reduced maximum aerobic performance ( $MO_{2max}$ ) and aerobic scope.

### Blood and heart mass

Haematocrit, haemoglobin and heart mass all showed similar patterns to one another (Table 1, Fig. 3 and online supplement Table S1). Species differed significantly for all three variables. Larger fish had significantly higher haemoglobin levels, and a larger heart mass. None of these metrics were affected by cortisol treatment or the interaction between species and treatment. Tukey *post hoc* tests of the estimated marginal means (Online supplement Tables S1 and S2) show that pink salmon had higher haematocrit and haemoglobin levels, as well as a larger heart mass relative to their body mass, as compared to their Chinook or sockeye counterparts in both control and cortisol treatment groups.

### Enzyme assays

There was no effect of cortisol treatment on CS or LDH activity; however, species and the interaction between treatment and species both had a significant influence (Table 1, Fig. 4 and online supplement Table S1). Tukey *post hoc* tests of the estimated marginal means (Online supplement Tables S1 and S2) show that pink salmon had higher CS activity than their Chinook or sockeye counterparts in both control and cortisol treatment groups. Control sockeye salmon and pink salmon both had higher LDH activity than control Chinook salmon. In the cortisol treatment group, sockeye salmon had

higher LDH activity than pink salmon or Chinook salmon, and pink salmon had higher LDH activity than Chinook salmon.

### Discussion

This study shows that exposure to cortisol early in development can have persistent effects on juvenile Pacific salmon aerobic performance after hatch. Cortisol is released into the circulatory system of fish as part of the neuroendocrine response to stress (Barton, 2002), and previous work has found that increases in maternal plasma cortisol can translate to higher egg cortisol levels (Stratholt *et al.*, 1997). In all three species examined in our study, juvenile fish that were exposed to increased cortisol during embryonic development exhibited lower maximum oxygen consumption and aerobic scope than control fish, but maintained similar resting oxygen consumption. These results indicate that maternal stress during upriver migration could lead to impaired offspring performance across a range of species.

Contrary to expectations, we did not find differences between treatment groups in the oxygen-transport metrics that we measured. However, this does not preclude the possibility that cortisol may have an effect on these metrics

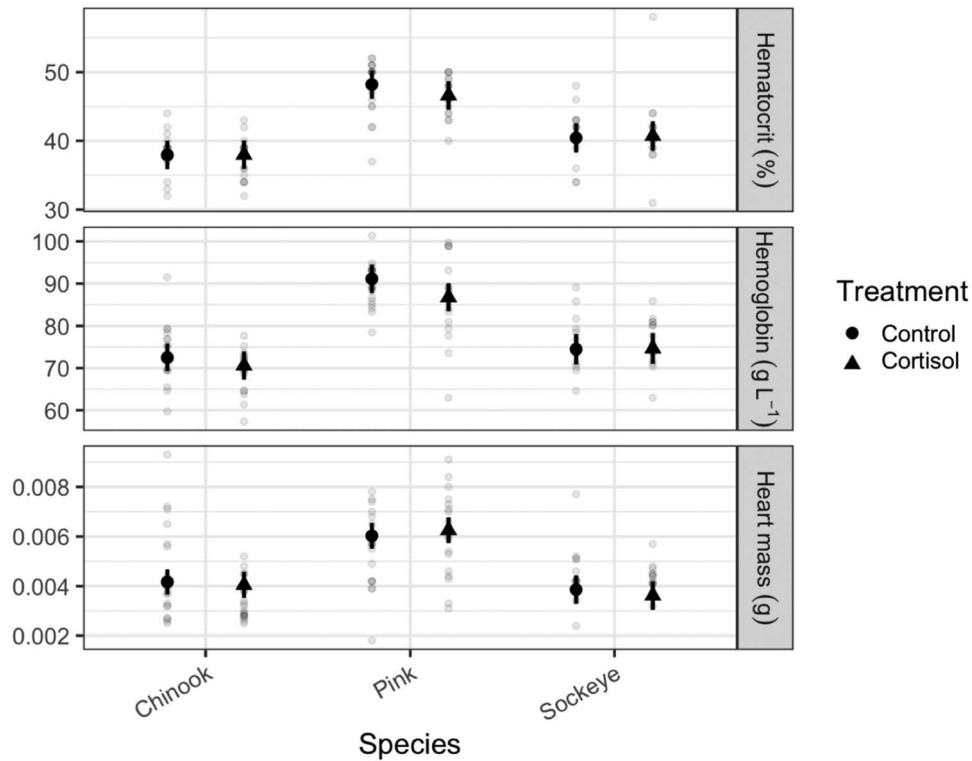

**Figure 3:** Blood and heart metrics of three species of Pacific salmon. Estimated marginal means and 95% confidence intervals are shown in black. Grey circles represent individual fish. Cortisol exposure did not significantly affect these metrics.

under different circumstances, or on different oxygen transport metrics. For example, egg cortisol levels in our study were relatively high before treatment (see online supporting information); it is possible that cortisol does influence the oxygen delivery metrics we examined, but the effect was saturated at the levels examined in our study and could not be further enhanced. Additionally, our work focused on only a subset of traits that are involved in oxygen transport; there are a number of other variables that future work could examine. For example, cardiac performance, gill surface area and variation in other haemoglobin characteristics such as oxygen-binding affinity could also influence aerobic performance (Weibel, 1984; Weber, 2000). Similarly, other metrics such as mtDNA copy number and cardiolipin content have been used to estimate mitochondrial content in vertebrates, and there is no clear consensus on which metrics best represent actual mitochondrial performance (Kraffe *et al.*, 2007; Porter and Wall, 2012). Examination of these, and other factors involved in oxygen transport and use, will provide a more complete picture of how cortisol exposure during embryonic development affects Pacific salmon. Notably, we did find differences in  $MO_{2max}$  and aerobic scope across species, which were clearly associated with differences in oxygen transport metrics. Specifically, in both treatment groups, pink salmon had a higher  $MO_{2max}$  and aerobic scope relative to the other species, which was

supported by greater haematocrit, haemoglobin, a larger heart and higher CS activity.

The differences we found in aerobic performance between treatment groups may also be mediated via the effects of egg cortisol on fish behaviour and motivation. Multiple studies have examined the relationship between prenatal stress and behaviour in fishes. In three-spined stickleback (*Gasterosteus aculeatus*), offspring from mothers that were exposed to high levels of a predation stressor exhibited less successful anti-predator behaviours (McGhee *et al.*, 2012), and were slower in learning tasks that paired certain cues with a food reward (Roche *et al.*, 2012). Atlantic salmon (*Salmo salar*) offspring from mothers that received an intraperitoneal cortisol implant prior to egg collection exhibited more unsuccessful feeding attempts, showed higher levels of aggression when they had established social dominance in a group, and spent less time moving when subjected to an acute confinement stressor (Eriksen *et al.*, 2011). In studies that simulated maternal stress via egg cortisol baths, coho salmon (*Oncorhynchus kisutch*) offspring showed increased social dominance and boldness when challenged with a conspecific intruder or predator, respectively (Sopinka *et al.*, 2015) and brown trout (*Salmo trutta*) were more aggressive and showed reduced learning in a maze test (Sloman, 2010). Though the goal in many respirometry studies is

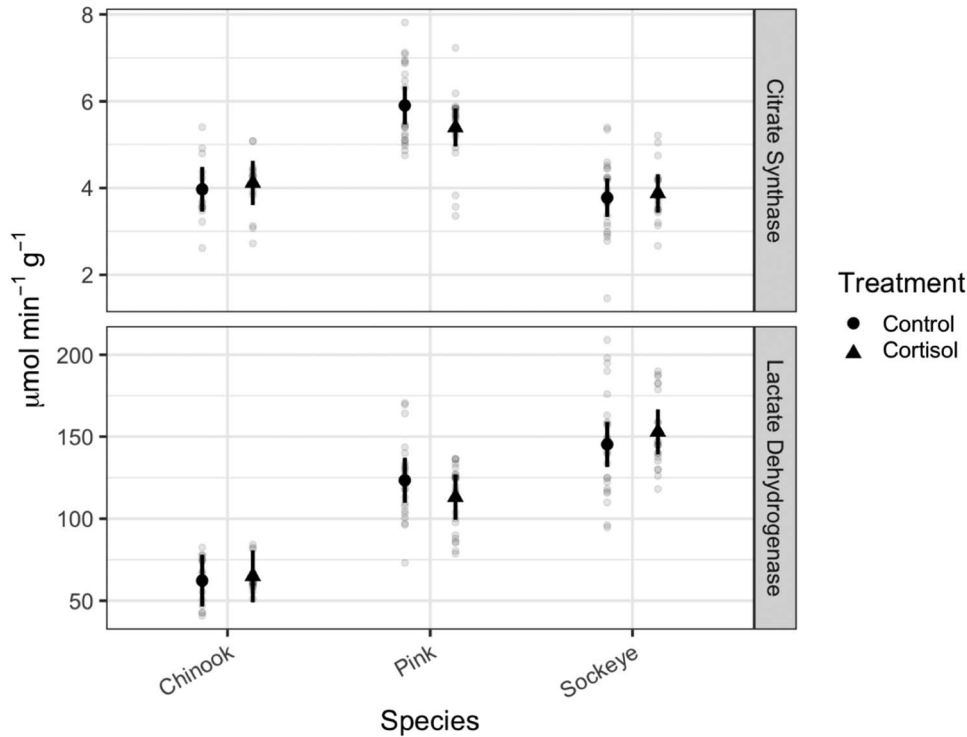

**Figure 4:** Enzyme activity per gram of tissue in the caudal muscle of three species of Pacific salmon. Estimated marginal means and 95% confidence intervals are shown in black. Grey circles represent individual fish. Cortisol exposure did not significantly affect these metrics.

to get accurate representations of maximum physiological performance, behavioural differences in fish can influence oxygen consumption measurements (Clark *et al.*, 2013).

Cortisol may not be the only component of the stress response that can be transmitted between generations. In one recent study, sockeye salmon (*O. nerka*) adults were subjected to a chronic chase stressor for several weeks prior to spawning. Offspring from these fish swam for shorter durations and initiated burst swimming more often than fish from a control group, despite no detectable differences in egg cortisol levels (Sopinka *et al.*, 2014). The authors of the study hypothesized that other egg hormones associated with the maternal stress response, as well as heritable stress-induced epigenetic effects, may have contributed to their results. As such, we caution that while this study specifically looked at the effects of cortisol, the intergenerational effects of stress may be transmitted via multiple mechanisms.

It is unclear whether the effects of cortisol exposure observed in this study have an adaptive value, or if they represent a non-adaptive physiological consequence of maternal stress. Reductions in swimming performance of fish have been linked to reduced migration success (Farrell *et al.*, 2008), increased susceptibility to predators (Walker *et al.*, 2005) and a general reduction in fitness, though few studies have directly tested this last relationship (Langerhans and Reznick, 2010). Additional work that focuses on the

long-term ecological effects of embryonic cortisol exposure needs to be conducted in order to fully understand any fitness consequences on semelparous species.

This study has demonstrated that cortisol exposure during embryonic development can result in reduced aerobic swimming performance after hatch in Pacific salmon. Though the long-term fitness consequences of this result need to be explored, research has generally associated higher swimming performance with increased success of fitness-related activities, such as predator avoidance and migration. Traditionally, the management and conservation of migratory fish populations has relied primarily on ensuring sufficient fish return to the spawning grounds. However, if deleterious effects of maternal stress persist into the next generation, then conservation programs may benefit by taking the sub-lethal effects of stress on maternal condition into account during the development of management plans. These sub-lethal effects may have increasing importance in the future, given the projected influence of climate change and other anthropogenic stressors moving forward.

## Supplementary material

Supplementary material is available at *Conservation Physiology* online.



## Acknowledgements

We thank A. Bass, K. Cook, N. Furey, J. Hills, A. Lotto, D. McKay, T. Nettles, N. Sopinka, C. Story, P. Szekeres, A. Teffer, L. Thompson and numerous undergraduate volunteers, who provided assistance in the lab and field. P. Segre created the map used in Figure 1. The DFO Environmental Watch program provided logistic and field support.

AIB, DAP, and SGH developed the study questions. AIB, SJH, and EJE designed the experiments. AIB and SJH performed the experiments. AIB, EJE and EAR analysed the data. EAR created the graphs. AIB wrote the manuscript. SJH, EJE, EAR, DAP, and SGH provided editorial advice on the manuscript.

## Funding

This work was supported by the National Science Foundation Office of International Science and Engineering International Research Fellowship Program [#1158966 to AIB], and through a Canada Natural Science and Engineering Research Council Discovery Grant [to SGH].

## Data accessibility

Data will be uploaded to the DryAd Digital Repository.

## References

- Agrawal AA, Laforsch C, Tollrian R (1999) Transgenerational induction of defences in animals and plants. *Nature* 401: 60–63.
- Auperin B, Geslin M (2008) Plasma cortisol response to stress in juvenile rainbow trout is influenced by their life history during early development and by egg cortisol content. *Gen Comp Endocrinol* 158: 234–239.
- Barton BA (2002) Stress in fishes: a diversity of responses with particular reference to changes in circulating corticosteroids. *Integr Comp Biol* 42: 517–525.
- Bernardo J (1996) Maternal effects in animal ecology. *Integr Comp Biol* 36: 83–105.
- Bradford MJ, Lovy J, Patterson DA (2010) Infection of gill and kidney of Fraser River sockeye salmon, *Oncorhynchus nerka* (Walbaum), by *Parvicapsula minibicornis* and its effect on host physiology. *J Fish Dis* 33: 769–779.
- Burt JM, Hinch SG, Patterson DA (2010) The importance of parentage in assessing temperature effects on fish early life history: a review of the experimental literature. *Rev Fish Biol Fisheries* 21: 377–406. doi: 10.1007/s11160-010-9179-1.
- Charmantier A, Garant D (2005) Environmental quality and evolutionary potential: lessons from wild populations. *Proc R Soc Lond [Biol]* 272: 1415–1425.
- Clark TD, Eliason EJ, Sandblom E, Hinch SG, Farrell AP (2008) Calibration of a hand-held haemoglobin analyser for use on fish blood. *J Fish Biol* 73: 2587–2595.
- Clark TD, Sandblom E, Jutfelt F (2013) Aerobic scope measurements of fishes in an era of climate change: respirometry, relevance and recommendations. *J Exp Biol* 216: 2771–2782.
- Cook KV, Crossin GT, Patterson DA, Hinch SG, Gilmour KM, Cooke SJ (2014) The stress response predicts migration failure but not migration rate in a semelparous fish. *Gen Comp Endocrinol* 202: 44–49.
- Dalziel AC, Schulte PM (2012) Correlates of prolonged swimming performance in F2 hybrids of migratory and non-migratory threespine stickleback. *J Exp Biol* 215: 3587–3596.
- Donaldson MR, Hinch SG, Jeffries KM, Patterson DA, Cooke SJ, Farrell AP, Miller KM (2014) Species- and sex-specific responses and recovery of wild, mature pacific salmon to an exhaustive exercise and air exposure stressor. *Comp Biochem Physiol A* 173: 7–16.
- Eliason EJ, Clark TD, Hinch SG, Farrell AP (2013) Cardiorespiratory collapse at high temperature in swimming adult sockeye salmon. *Conserv Physiol* 1, pp. 1–19. doi: 10.1093/conphys/cot008.
- Eriksen MS, Færevik G, Kittilsen S, McCormick MI, Damsgård B, Braithwaite VA, Braastad BO, Bakken M (2011) Stressed mothers- troubled offspring: a study of behavioural maternal effects in farmed *Salmo salar*. *J Fish Biol* 79: 575–586.
- Farrell AP, Hinch SG, Cooke SJ, Patterson DA, Crossin GT, Lapointe M, Mathes MT (2008) Pacific salmon in hot water: applying aerobic scope models and biotelemetry to predict the success of spawning migrations. *Physiol Biochem Zool* 81: 697–709.
- Gale MK, Hinch SG, Cooke SJ, Donaldson MR, Eliason EJ, Jeffries KM, Martins EG, Patterson DA (2014) Observable impairments predict mortality of captured and released sockeye salmon at various temperatures. *Conserv Physiol* 2, pp. 1–15. doi: 10.1093/conphys/cou029.
- Ho DH, Burggren WW (2010) Epigenetics and transgenerational transfer: a physiological perspective. *J Exp Biol* 213: 3–16.
- Hutchings JA (1991) Fitness consequences of variation in egg size and food abundance in brook trout *Salvelinus fontinalis*. *Evolution* 45: 1162–1168.
- Jeffries KM, Hinch SG, Sierocinski T, Pavlidis P, Miller KM (2014) Transcriptional responses to high water temperature in two species of Pacific salmon. *Evol Appl* 7: 286–300.
- Kenward MG, Roger JH (1997) Small sample inference for fixed effects from restricted maximum likelihood. *Biometrics* 53: 983–997.
- Kraffe E, Marty Y, Guderley H (2007) Changes in mitochondrial oxidative capacities during thermal acclimation of rainbow trout *Oncorhynchus mykiss*: roles of membrane proteins, phospholipids and their fatty acid compositions. *J Exp Biol* 210: 149–165.
- Langerhans RB, Reznick DN (2010) Ecology and evolution of swimming performance in fishes: predicting evolution with biomechanics. In

- P Domenici, BG Kampoer, eds, *Fish Locomotion: An Etho-Ecological Perspective*. Science Publishers, Boca Raton, Florida, pp. 200–248.
- Lenth RV (2018) Emmeans: Estimated Marginal Means, Aka Least-Squares Means. R package version 1.1.2. <https://CRAN.R-project.org/package=emmeans>.
- Marshall DJ, Uller T, (2007) When is a maternal effect adaptive? *Oikos* 116: 1957–1963.
- Martins EG, Hinch SG, Cooke SJ, Patterson DA (2012a) Climate effects on growth, phenology, and survival of sockeye salmon (*Oncorhynchus nerka*): a synthesis of the current state of knowledge and future research directions. *Rev Fish Biol Fisheries* 22: 887–914.
- Martins EG, Hinch SG, Patterson DA, Hague MJ, Cooke SJ, Miller KM, Robichaud D, English KK, Farrell AP (2012b) High river temperature reduces survival of sockeye salmon (*Oncorhynchus nerka*) approaching spawning grounds and exacerbates female mortality. *Can J Fish Aquat Sci* 69: 330–342.
- McGhee KE, Pintor LM, Suhr EL, Bell AM (2012) Maternal exposure to predation risk decreases offspring antipredator behaviour and survival in threespined stickleback. *Funct Ecol* 26: 932–940.
- Mousseau TA, Fox CW (1998) The adaptive significance of maternal effects. *Trends Ecol Evolut* 13: 403–407.
- Munday PL, McCormick MI, Nilsson GE (2012) Impact of global warming and rising CO<sub>2</sub> levels on coral reef fishes: what hope for the future? *J Exp Biol* 215: 3865–3873.
- Porter C, Wall BT (2012) Skeletal muscle mitochondrial function: is it quality or quantity that makes the difference in insulin resistance? *J Physiol (Lond)* 590: 5935–5936.
- Quinn TP (2005) *The Behavior and Ecology of Pacific Salmon and Trout*. UBC Press, Vancouver, British Columbia.
- R Core Team (2016) *R: A Language and Environment for Statistical Computing*. R Foundation for Statistical Computing, Vienna, Austria, <http://www.R-project.org/>.
- Raby GD, Clark TD, Farrell AP, Patterson DA, Bett NN, Wilson SM, Willmore WG, Suski CD, Hinch SG, Cooke SJ (2015) Facing the river gauntlet: understanding the effects of fisheries capture and water temperature on the physiology of coho salmon. *PLoS ONE* 10: e0124023.
- Reznick DN, Callahan H, Llauredo R (1996) Maternal effects on offspring quality in Poeciliid fishes. *Amer Zoo* 36: 147–156.
- Roche DP, McGhee KE, Bell AM (2012) Maternal predator-exposure has lifelong consequences for offspring learning in threespined sticklebacks. *Biol Lett* 8: 932–935.
- Schaeffer TW, Spengler DE, Schoenebeck CW, Brown ML, Chipps SR (2012) Effect of feeding–fasting cycles on oxygen consumption and bioenergetics of female yellow perch. *Trans Am Fish Soc* 141: 1480–1491.
- Searle SR, Speed FM, Milliken GA (1980) Population marginal means in the linear model: an alternative to least squares means. *Am Stat* 34: 216–221.
- Sloman KA (2010) Exposure of ova to cortisol pre-fertilisation affects subsequent behaviour and physiology of brown trout. *Horm Behav* 58: 433–439.
- Sopinka NM, Hinch SG, Healy SJ, Harrison PM, Patterson DA (2015) Egg cortisol treatment affects the behavioural response of coho salmon to a conspecific intruder and threat of predation. *Anim Behav* 104: 115–122.
- Sopinka NM, Hinch SG, Middleton CT, Hills JA, Patterson DA (2014) Mother knows best, even when stressed? Effects of maternal exposure to a stressor on offspring performance at different life stages in a wild semelparous fish. *Oecol* 175: 493–500.
- Stratholt ML, Donaldson EM, Liley NR (1997) Stress induced elevation of plasma cortisol in adult female coho salmon (*Oncorhynchus kisutch*), is reflected in egg cortisol content, but does not appear to affect early development. *Aquaculture* 158: 141–153.
- Svendsen JC, Banet AI, Christensen RHB, Steffensen JF, Aarestrup K (2013) Effects of intraspecific variation in reproductive traits, pectoral fin use and burst swimming on metabolic rates and swimming performance in the Trinidadian guppy (*Poecilia reticulata*). *J Exp Biol* 216: 3564–3574.
- Tierney KB, Patterson DA, Kennedy CJ (2009) The influence of maternal condition on offspring performance in sockeye salmon *Oncorhynchus nerka*. *J Fish Biol* 75: 1244–1257.
- Veldhoen N, Ikononou MG, Dubetz C, MacPherson N, Sampson T, Kelly BC, Helbing CC (2010) Gene expression profiling and environmental contaminant assessment of migrating Pacific salmon in the Fraser River watershed of British Columbia. *Aquat Toxicol* 97: 212–225.
- Walker JA, Ghalambor CK, Griset OL, McKenney D, Reznick DN (2005) Do faster starts increase the probability of evading predators? *Funct Ecol* 19: 808–815.
- Weber RE (2000) Adaptations for oxygen transport: lessons from fish hemoglobins. In *Hemoglobin Function in Vertebrates*. Springer, Milano, pp. 23–37.
- Weibel ER (1984) *The Pathway for Oxygen: Structure and Function in the Mammalian Respiratory System*. Harvard University Press, Cambridge, MA.
- Wolf JB, Wade MJ (2009) What are maternal effects (and what are they not)? *Philos Trans R Soc London Biol* 364: 1107–1115.
